# Supplementary figures and images for: Molecular phylogeny of Columbellidae (Gastropoda: Neogastropoda)
Source: PeerJ journal article supplement (doi:10.7717/peerj.13996), 2022-11-02

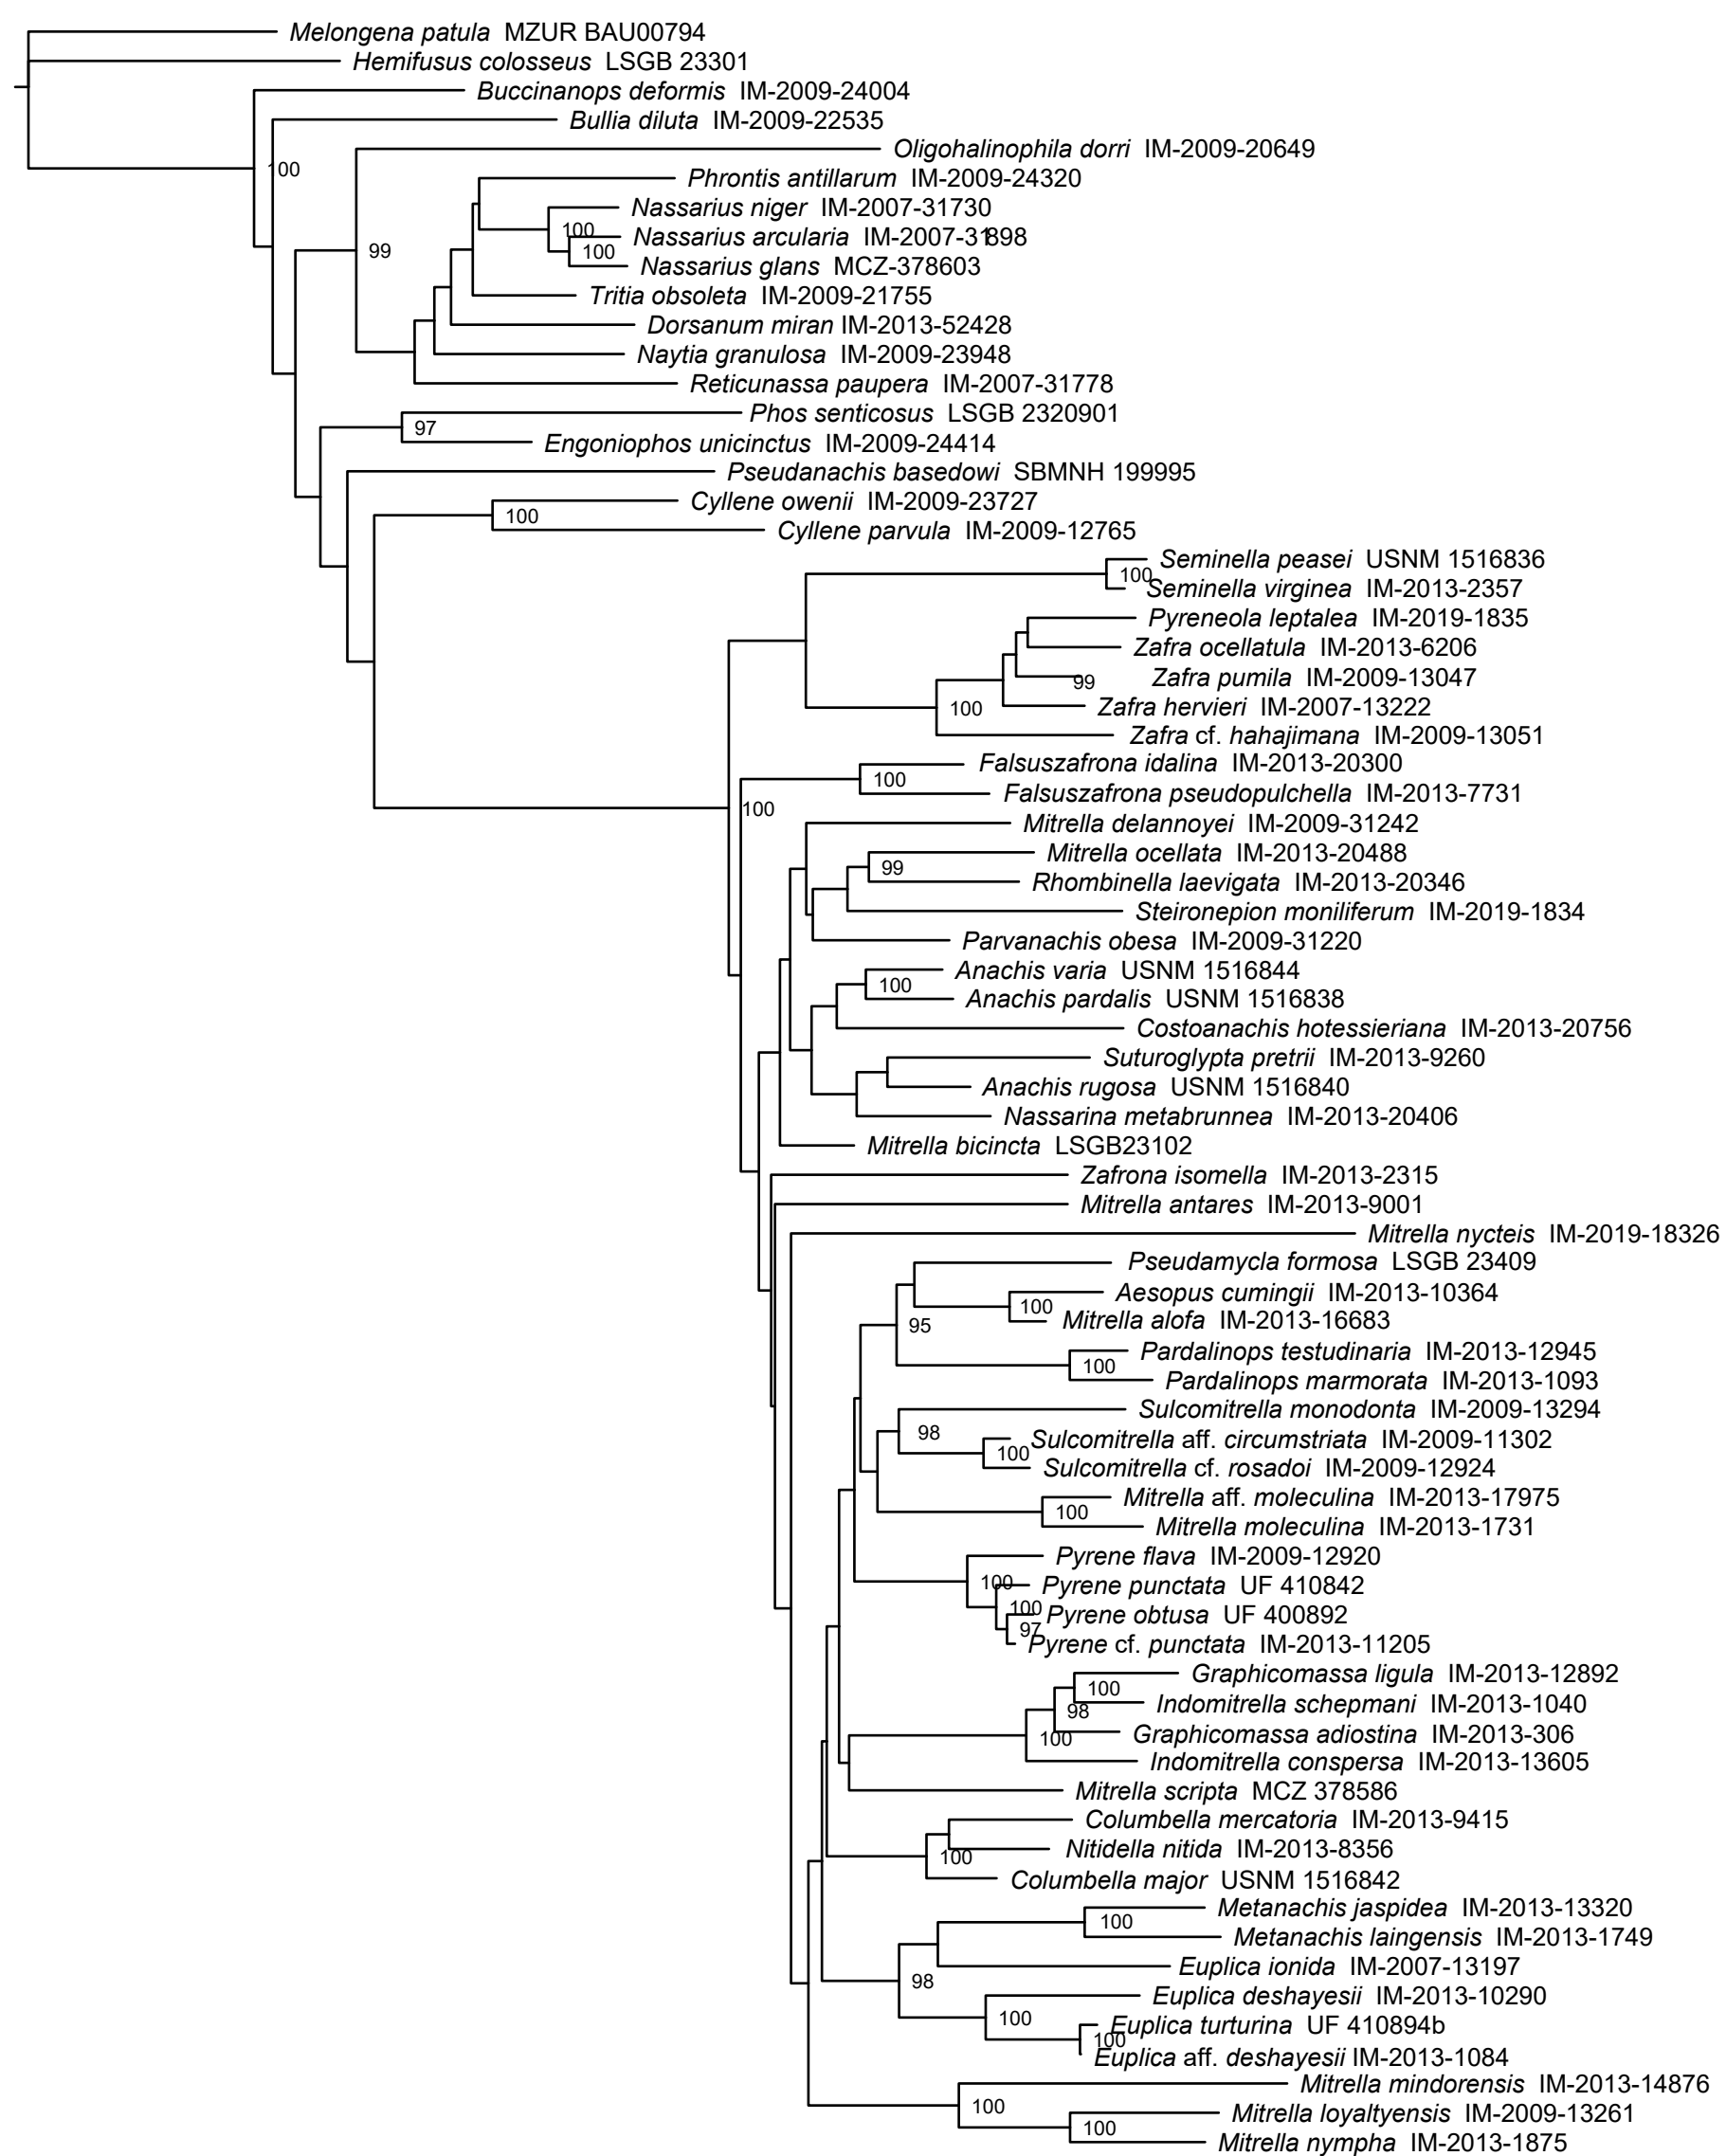

0.2

Supplement: FigS1_ColumbellNass_IQ_Tree_Reduced3.pdf [file FigS1_ColumbellNass_IQ_Tree_Reduced3.pdf]

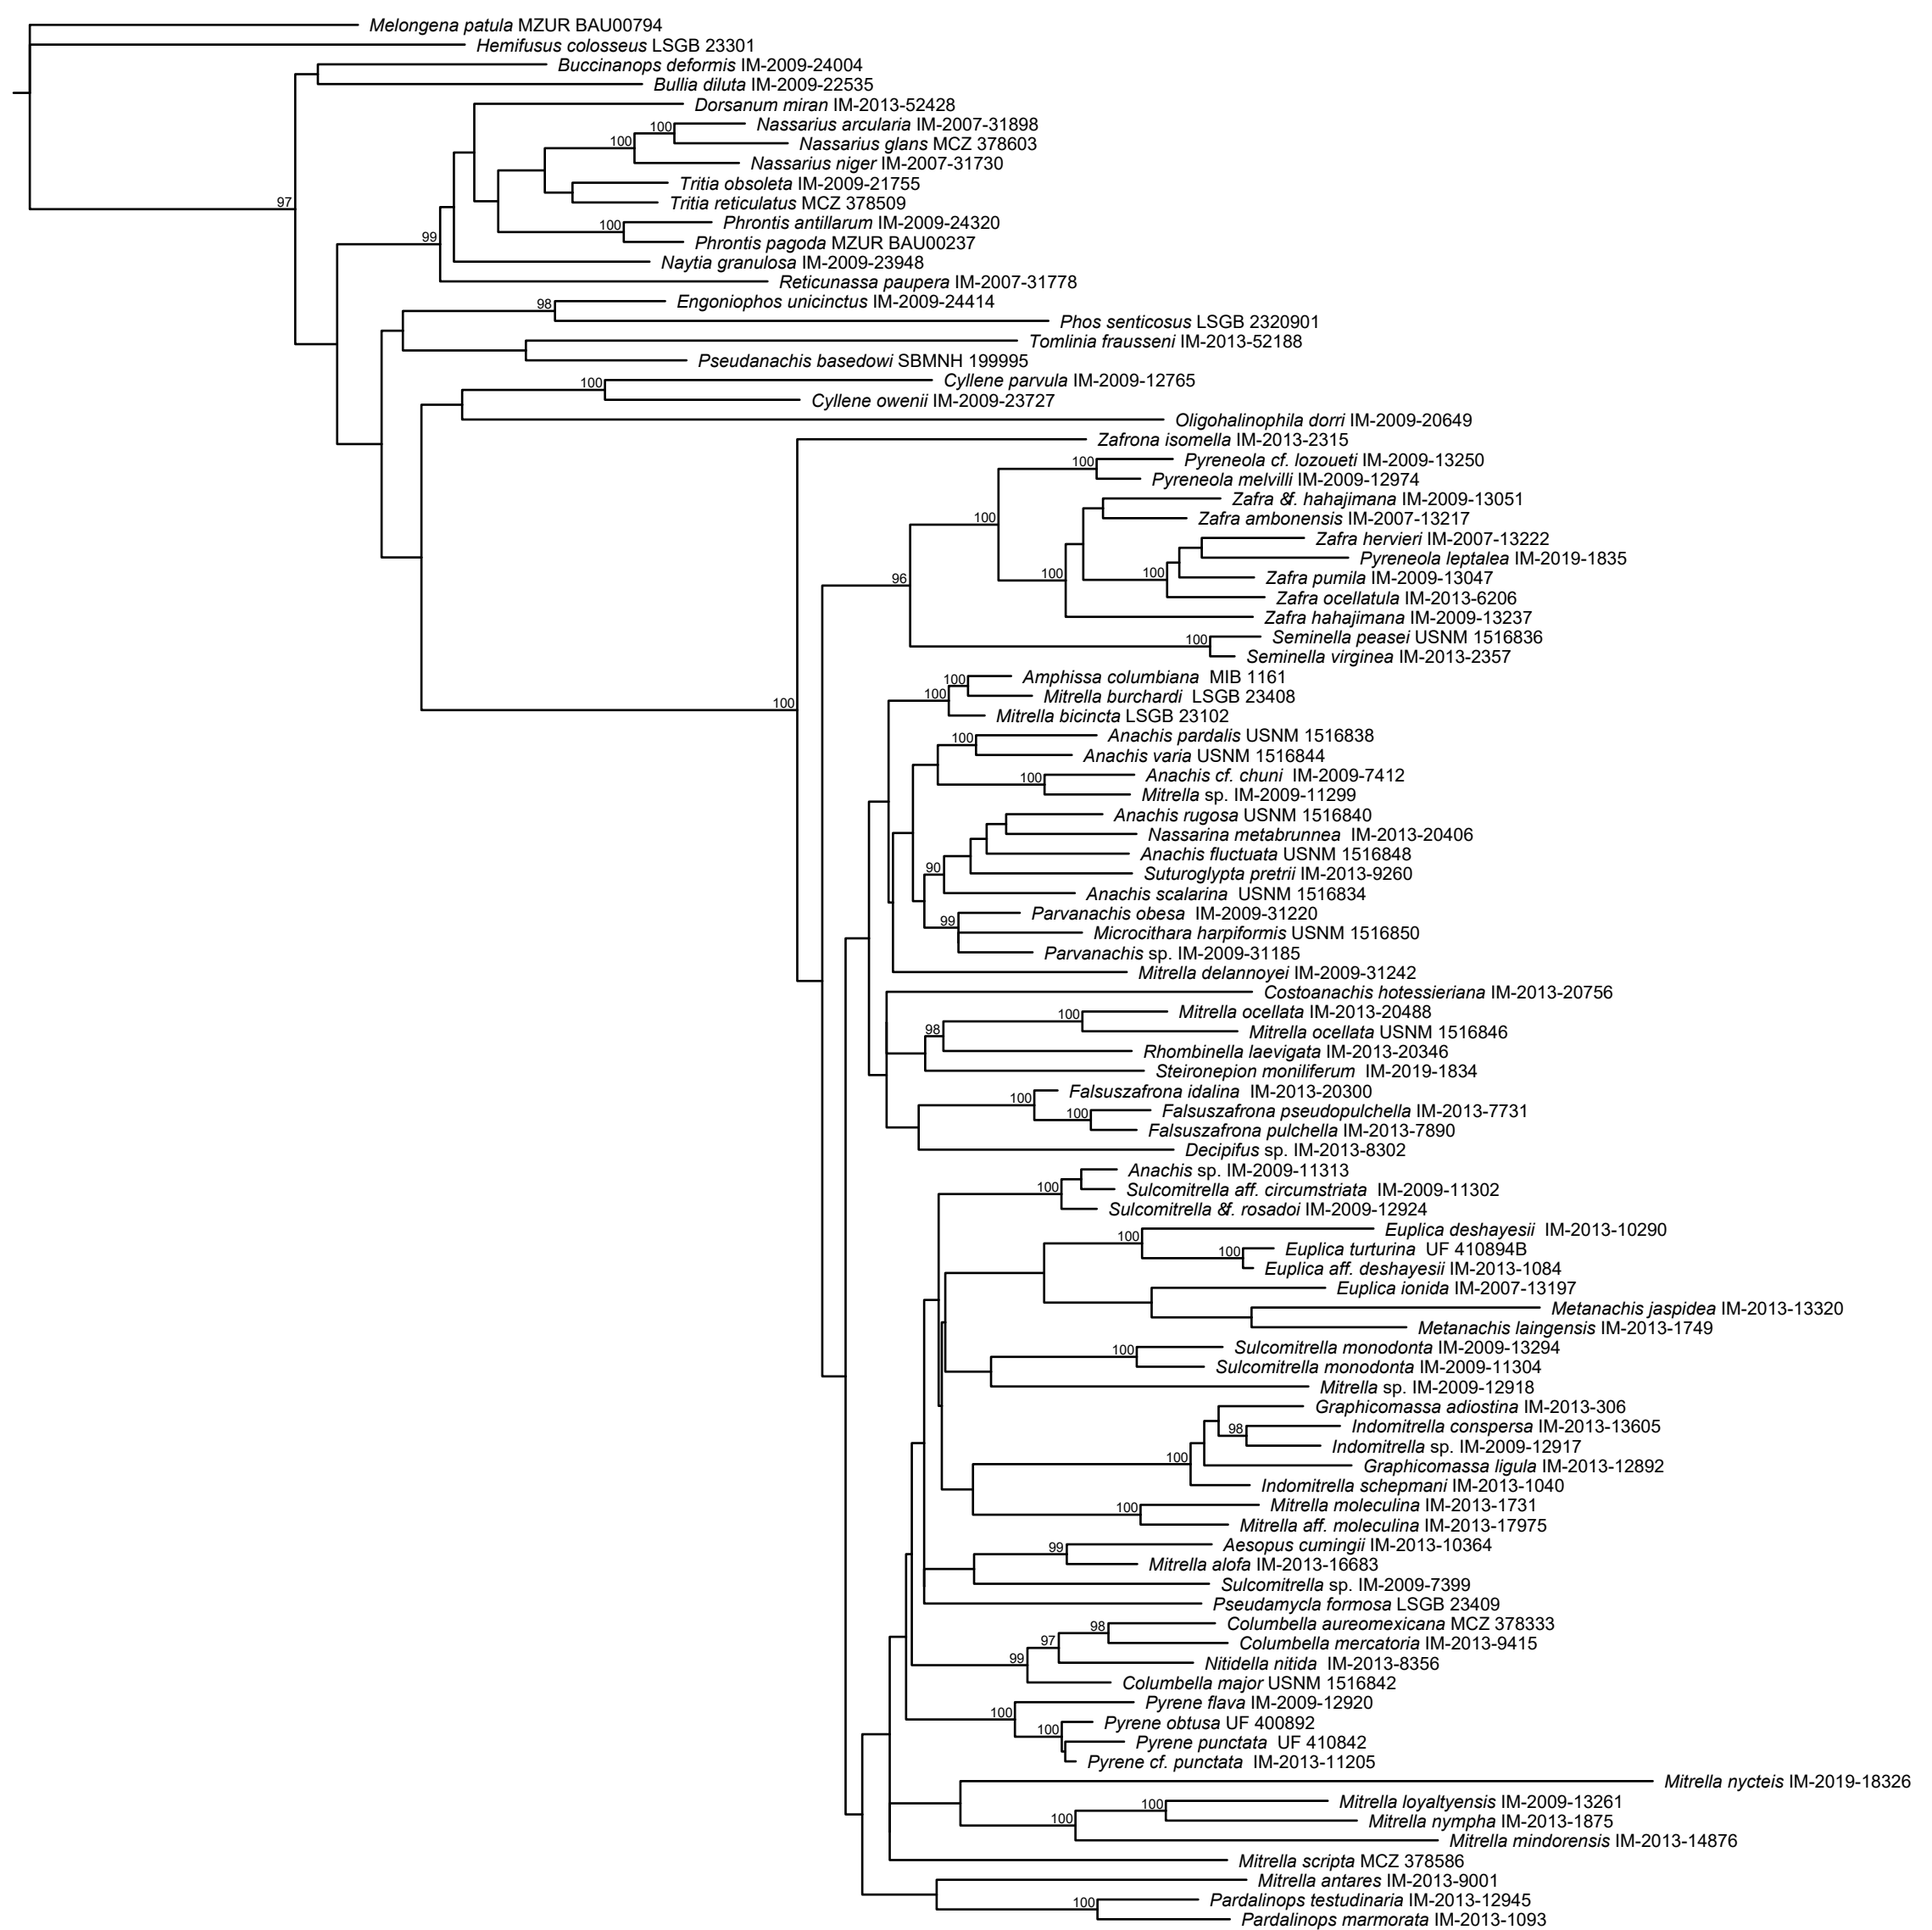

0.2

Supplement: FigS2_ColumbellNass_Mitochondrial_IQ_Tree.pdf [file FigS2_ColumbellNass_Mitochondrial_IQ_Tree.pdf]

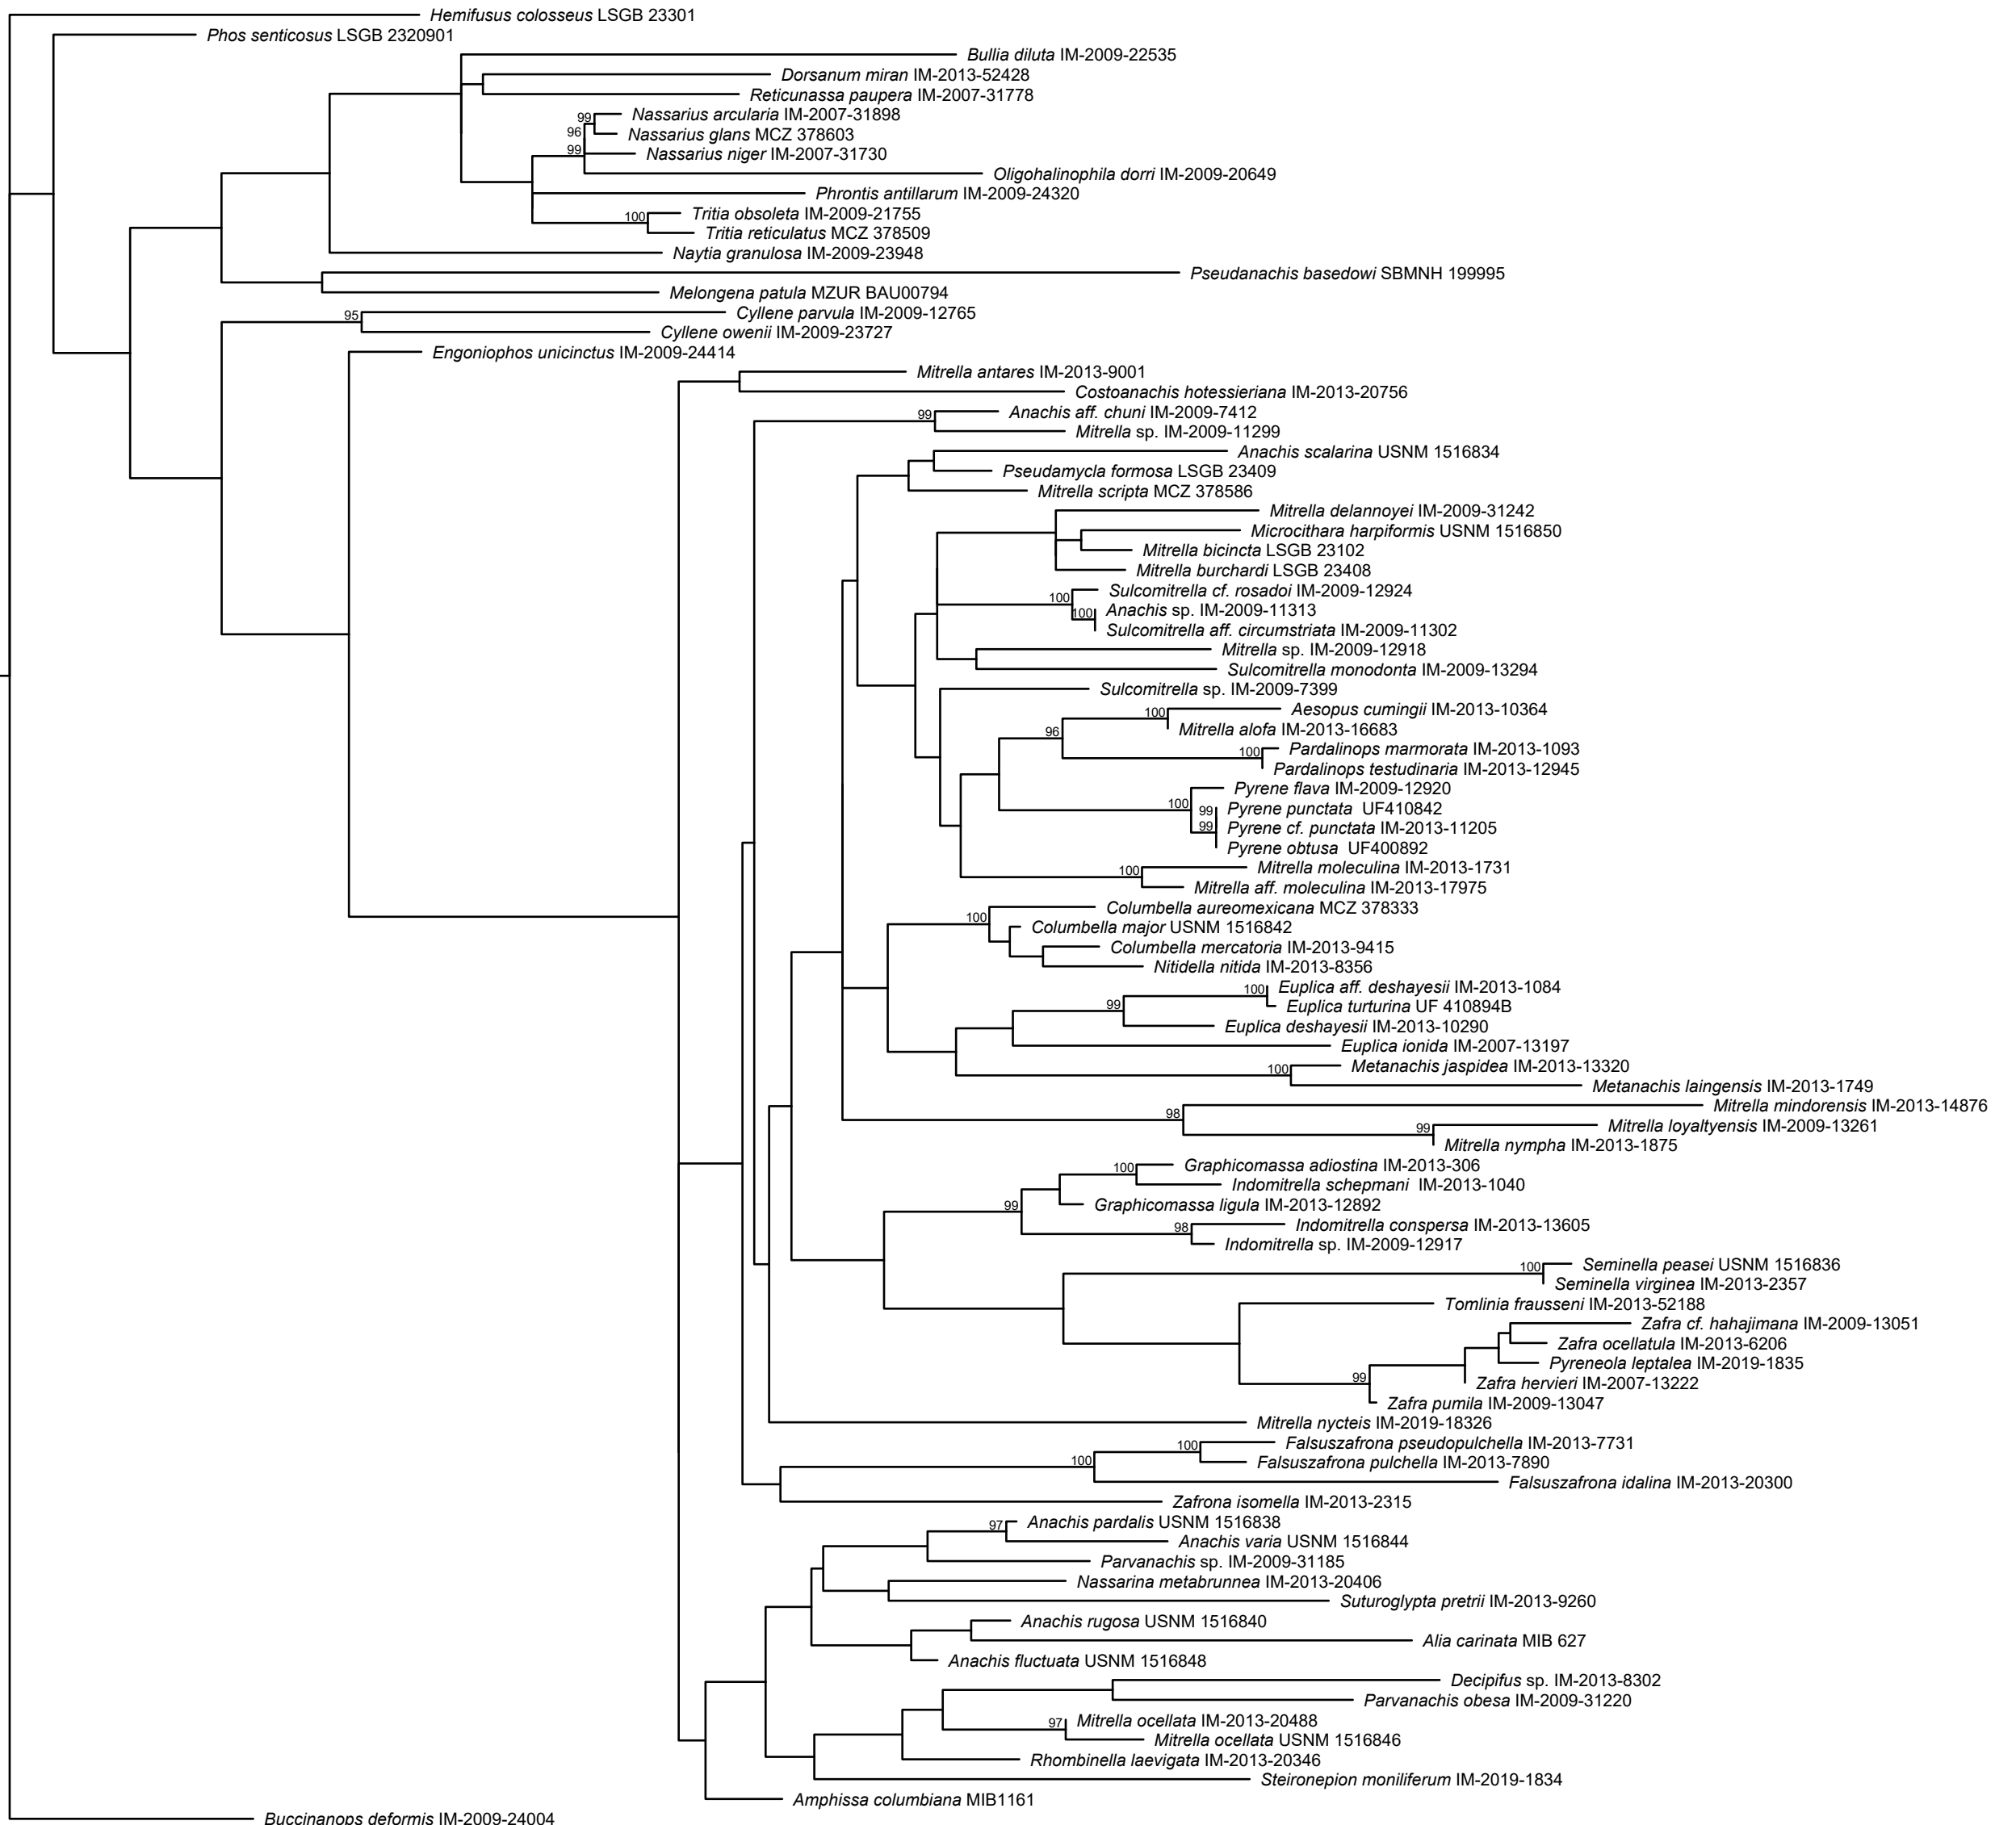

0.03

Supplement: FigS3_ColumbellNass_Nuclear_IQ_tree.pdf [file FigS3_ColumbellNass_Nuclear_IQ_tree.pdf]
